# Supplementary material
Source: publisher figshare collection journal article supplement (https://frontiersin.figshare.com/ndownloader/files/14340314)
Supplement: Supplementary file [file 14340314]

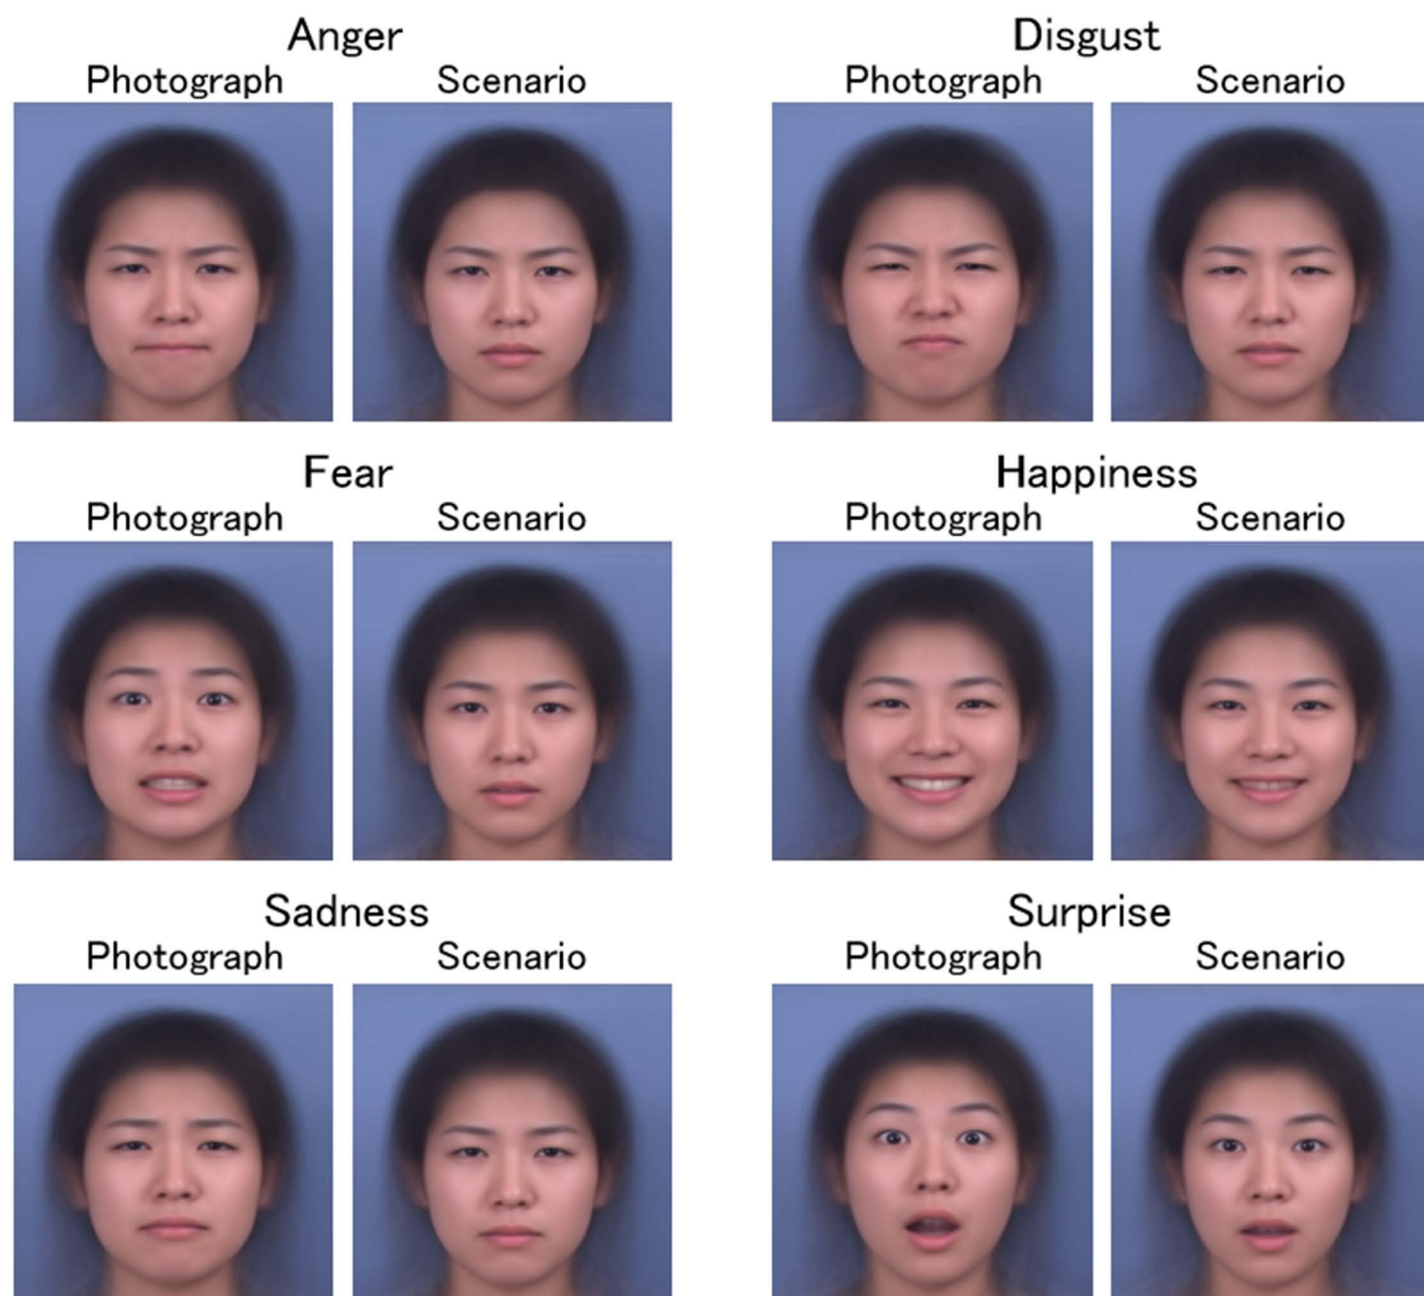

Supplementary Figure 2. The averaged faces under the photograph and scenario conditions. Only participants who provided written informed consent to show their data in articles were included ( $n = 55$ ; female, 67%).
